# Supplementary material
Source: PubMed Central journal article supplement (PMC7161314)
Supplement: NIHMS1572404-supplement-supplementary_information.pdf [file NIHMS1572404-supplement-supplementary_information.pdf]

Supporting information for:

Sequencing Heparan Sulfate Using HILIC LC-NETD-MS/MS

Jiandong Wu<sup>1</sup>, Juan Wei<sup>1</sup>, Pradeep Chopra<sup>2</sup>, Geert-Jan Boons<sup>2,3,4</sup>, Cheng Lin<sup>1</sup>

and Joseph Zaia<sup>1\*</sup>

1. Department of Biochemistry, Center for Biomedical Mass Spectrometry, Boston University School of Medicine, Boston, MA 02118, USA
2. Complex Carbohydrate Research Center, University of Georgia, Athens, Georgia 30602, USA
3. Department of Chemistry, University of Georgia, Athens, Georgia 30602, USA
4. Department of Chemical Biology and Drug Discovery, Utrecht Institute for Pharmaceutical Sciences and Bijvoet Center for Biomolecular Research, Utrecht University, Utrecht 3584 CG, Netherlands

\* Corresponding author:

Joseph Zaia  
670 Albany Street, Suite 505  
Boston, MA 02118  
Tel: 617-358-2429  
Email Address: [jzaia@bu.edu](mailto:jzaia@bu.edu)

## Table of Contents

|             |           |
|-------------|-----------|
| Figure S-1  | Page S-3  |
| Figure S-2  | Page S-4  |
| Figure S-3  | Page S-5  |
| Figure S-4  | Page S-6  |
| Figure S-5  | Page S-7  |
| Figure S-6  | Page S-8  |
| Figure S-7  | Page S-9  |
| Figure S-8  | Page S-10 |
| Figure S-9  | Page S-11 |
| Figure S-10 | Page S-12 |
| Figure S-11 | Page S-13 |
| Table S-1   | Page S-14 |
| Table S-2   | Page S-15 |
| Table S-3   | Page S-17 |
| Table S-4   | Page S-19 |
| Table S-5   | Page S-22 |
| Table S-6   | Page S-26 |
| Table S-7   | Page S-30 |
| Table S-8   | Page S-31 |

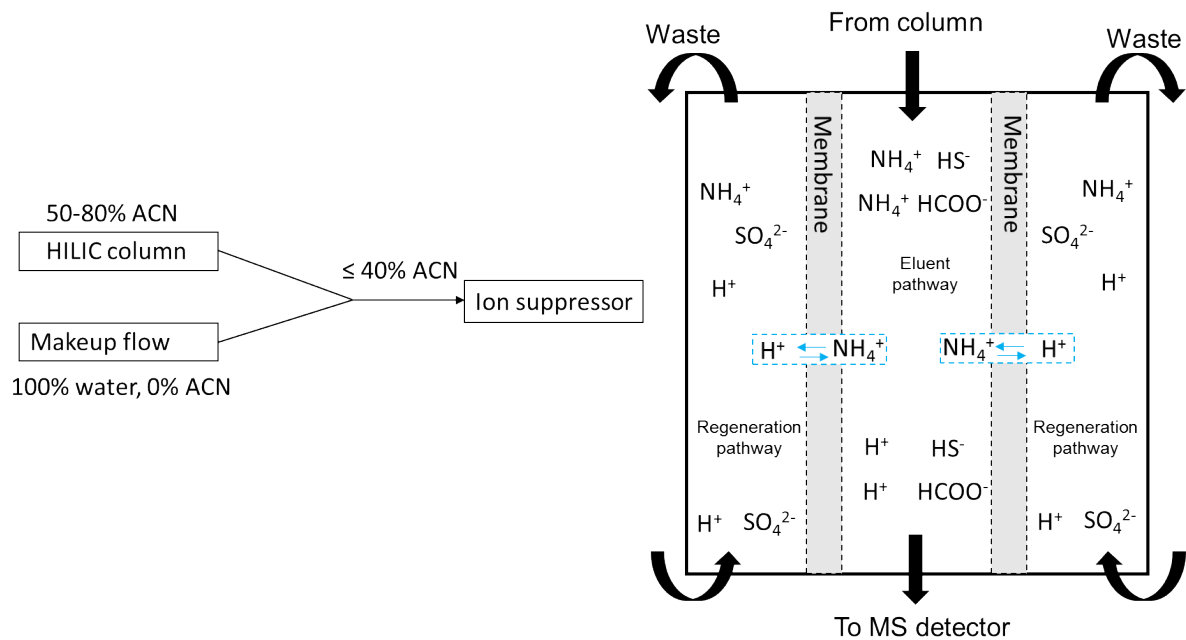

Figure S1. The LC flow path and the scheme of ion exchange in ion suppressor.  $\text{HS}^-$  indicates the anions of HS oligosaccharides.

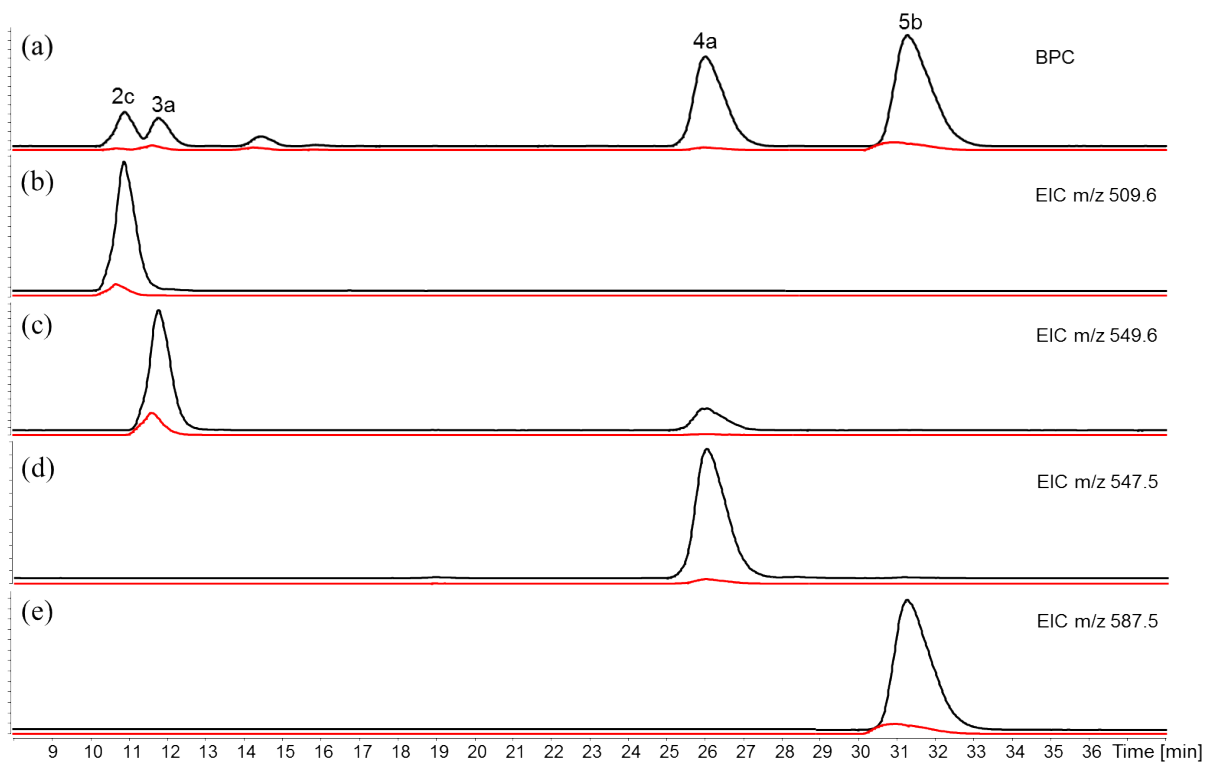

Figure S2. Influence of the use of the ion suppressor on LC peak width and signal intensity. The comparison of LC chromatograms were shown in panels. Red, without the ion suppressor; black, with the ion suppressor.

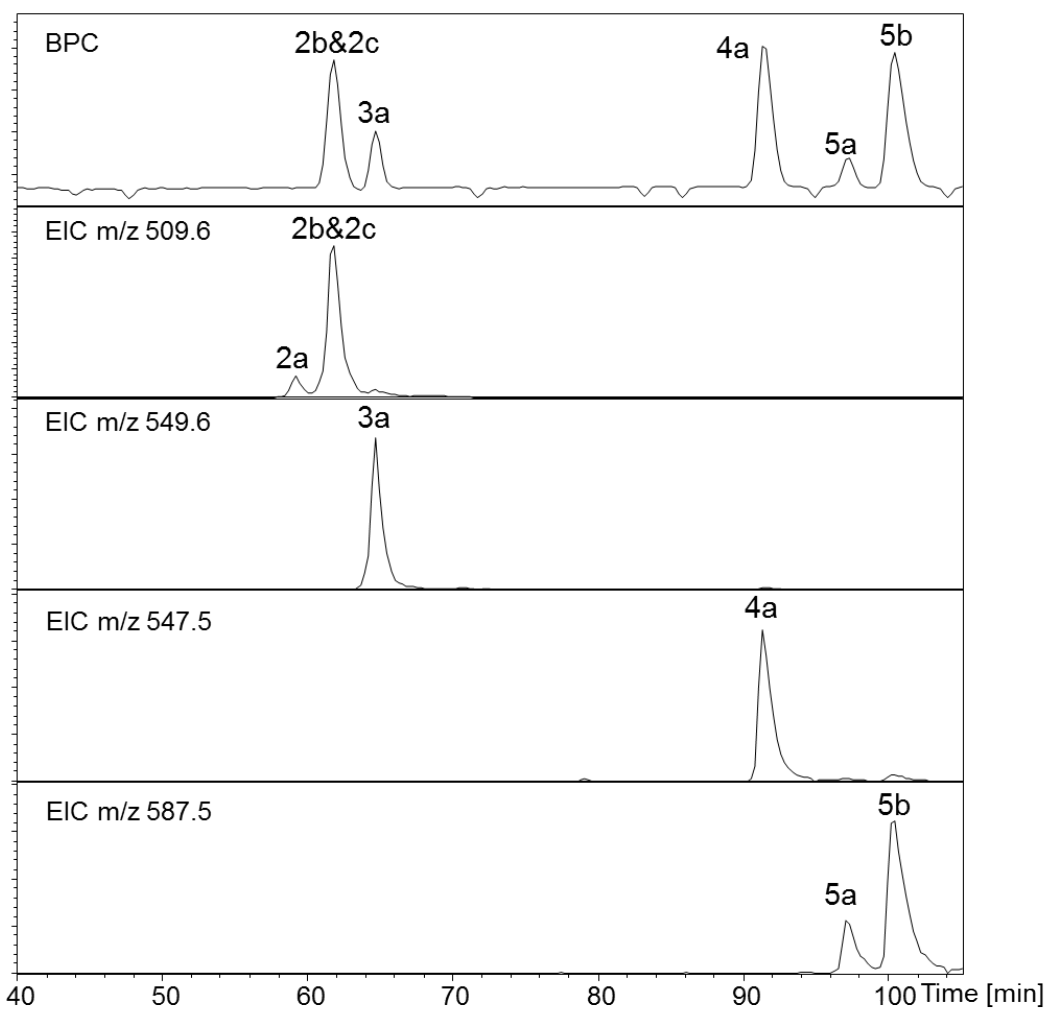

Figure S3. HILIC separation of the tetramers. **2a** was not shown in the BPC due to low abundance.

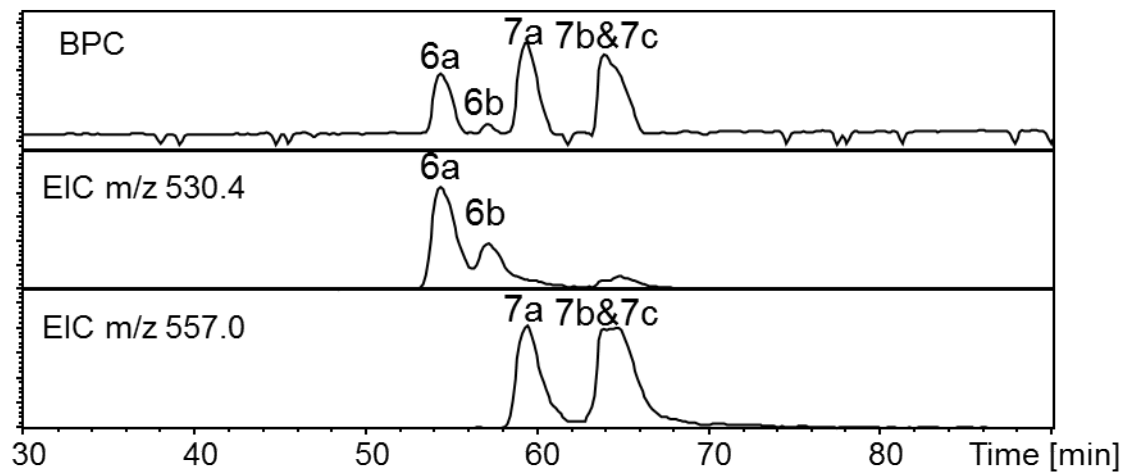

Figure S4. HILIC separation of the hexamers.

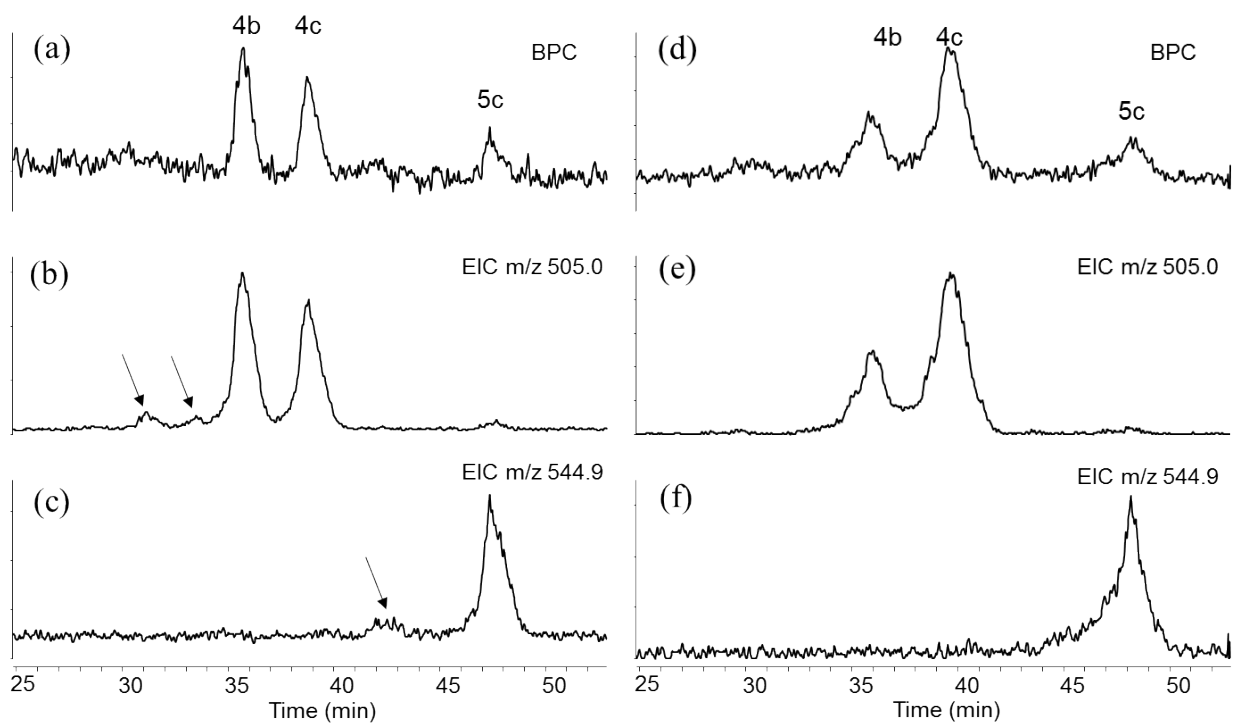

Figure S5. HILIC separation of tetramers without reducing end modification at different temperatures. Left panels, 25 °C; Right panels, 55 °C. Small anomeric peaks were observed and indicated with arrows in panel b and c.

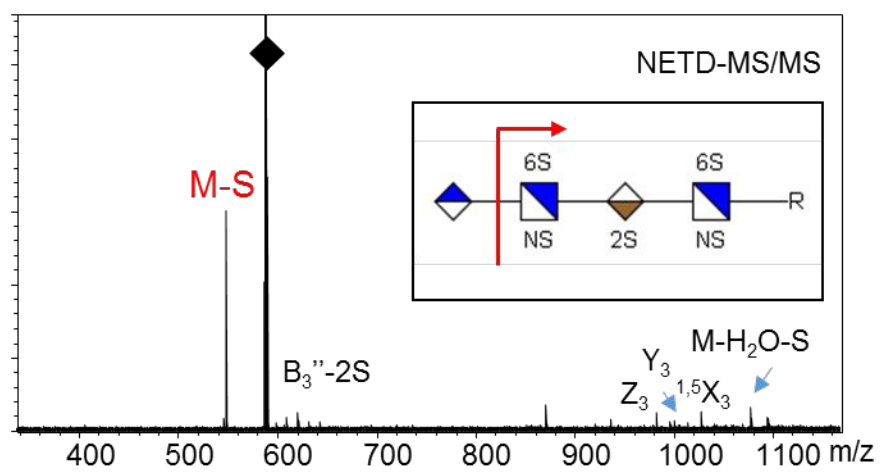

Figure S6. NETD-MS/MS spectrum of **5b** using the  $[M-2H]^{2-}$  precursor.



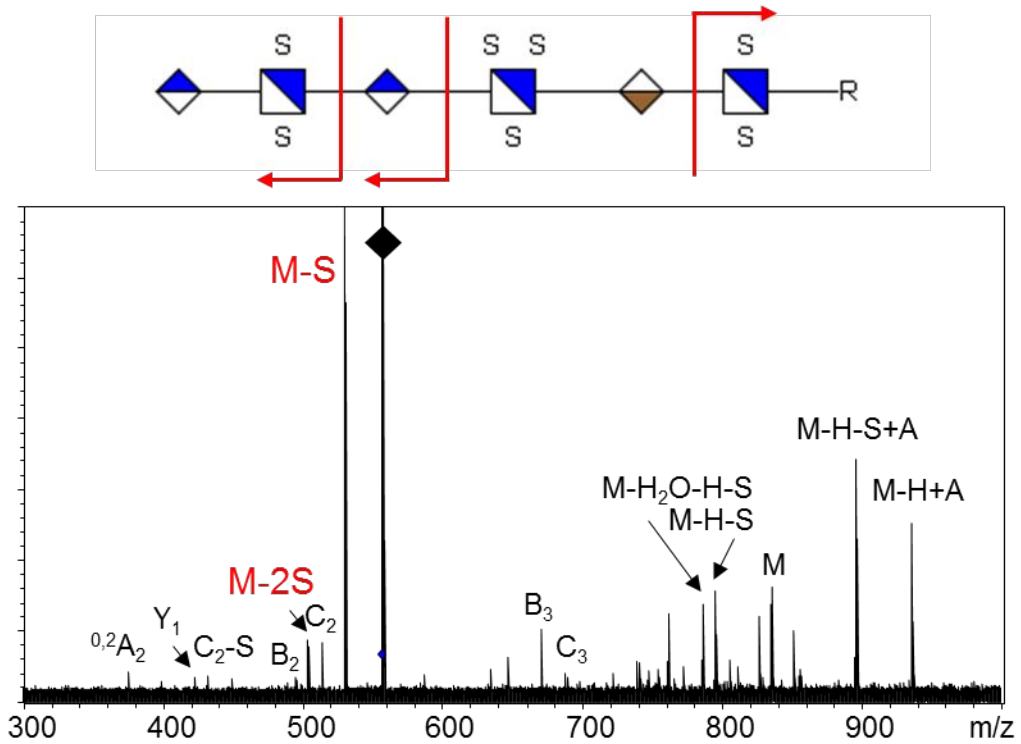

Figure S7. NETD-MS/MS spectrum of **7a** using the  $[M-3H]^{3-}$  precursor.

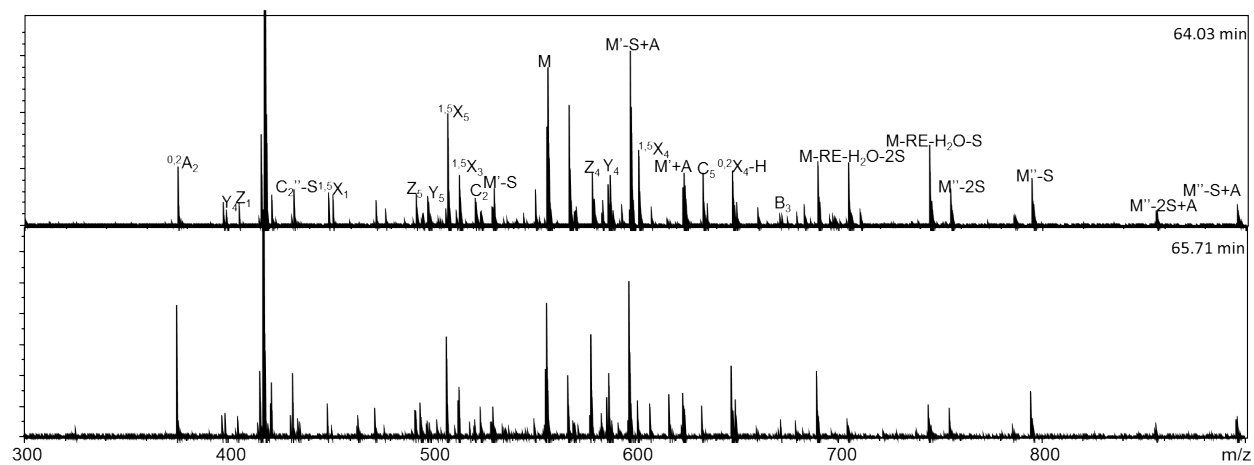

Figure S8. Annotated LC-MS/MS spectra of overlapped **7b** and **7c** at 64.03 and 65.71 min.

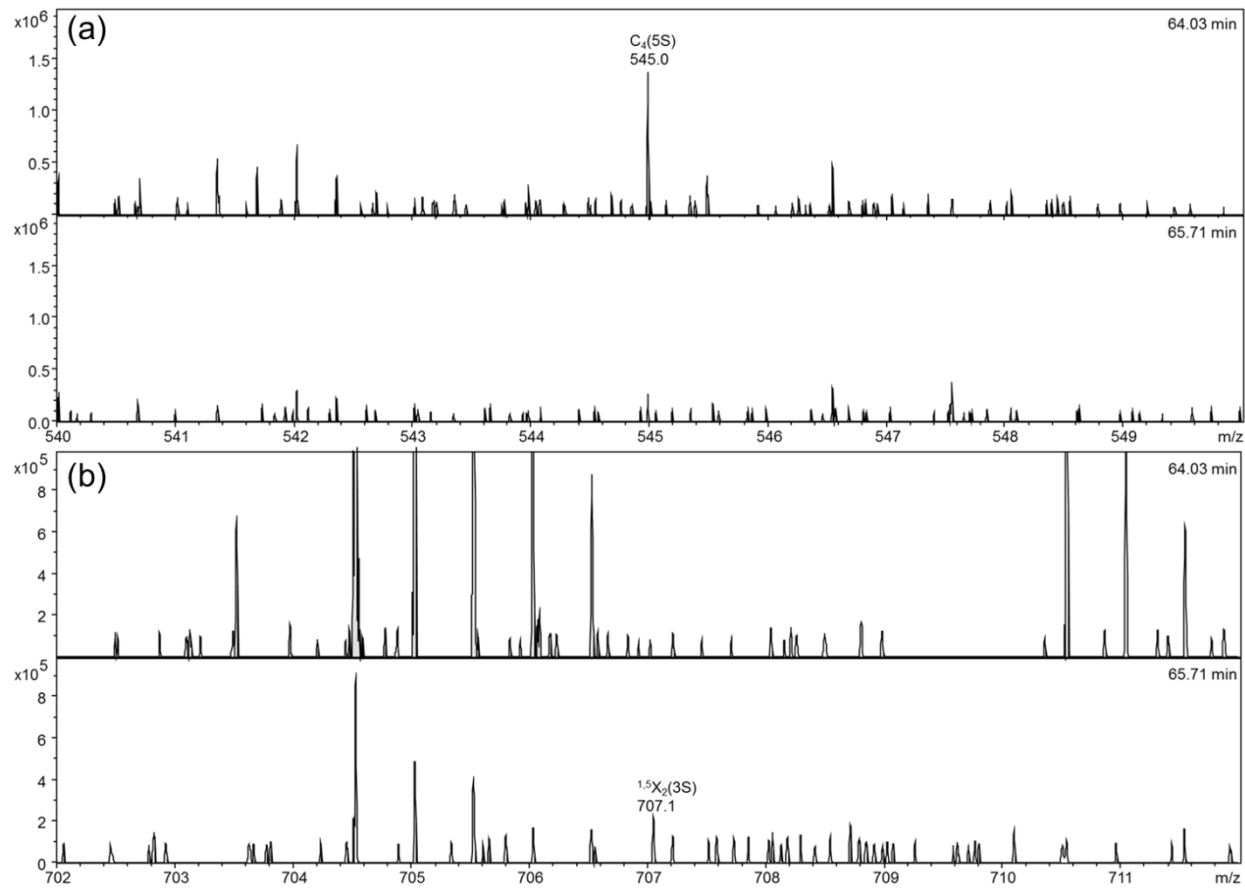

Figure S9. Zoom-in LC-MS/MS spectra of overlapped **7b** and **7c** at 64.03 and 65.71 min for selected diagnostic ions. (a),  $C_4(5S)$  at  $m/z$  545.0; (b),  $^{1,5}X_2(3S)$  at  $m/z$  707.1.

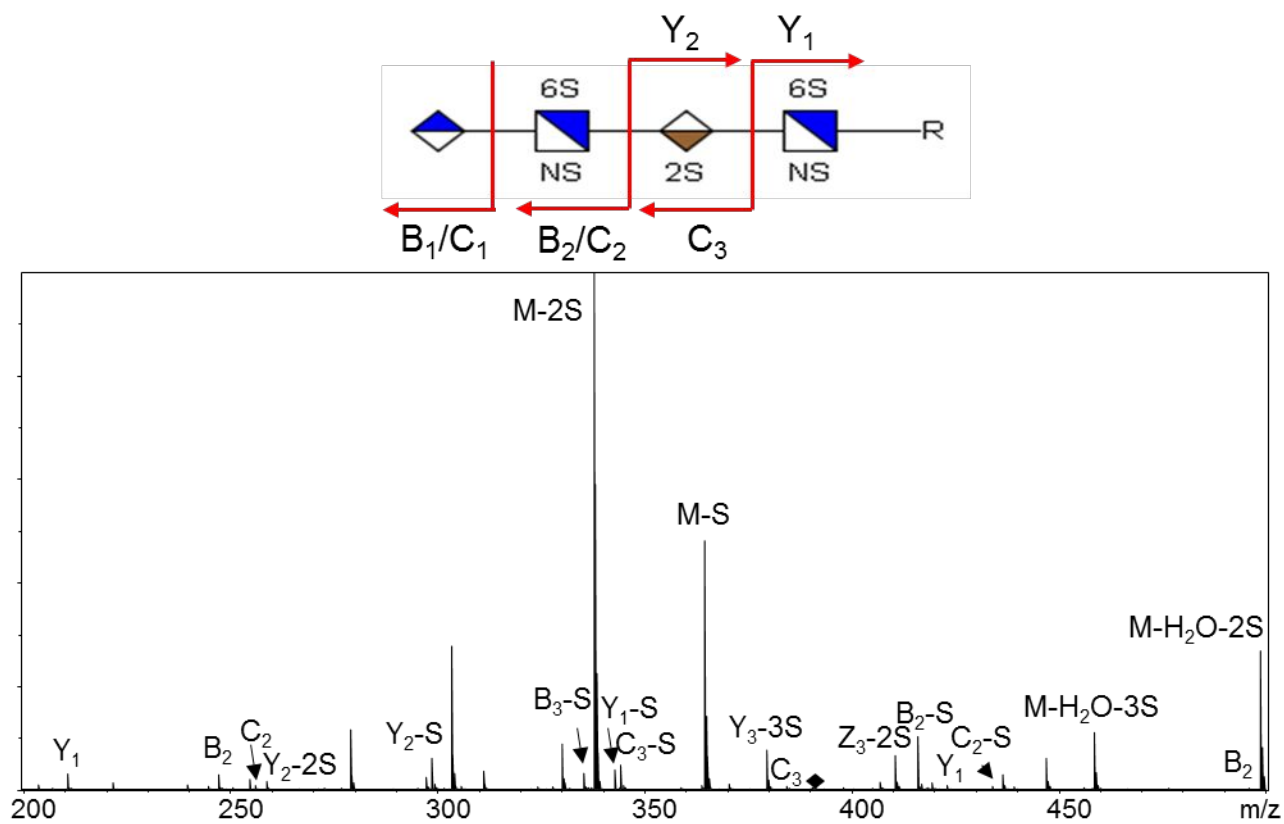

Figure S10. CID-MS/MS spectrum of **5b** using the  $[M-3H]^{3-}$  precursor.

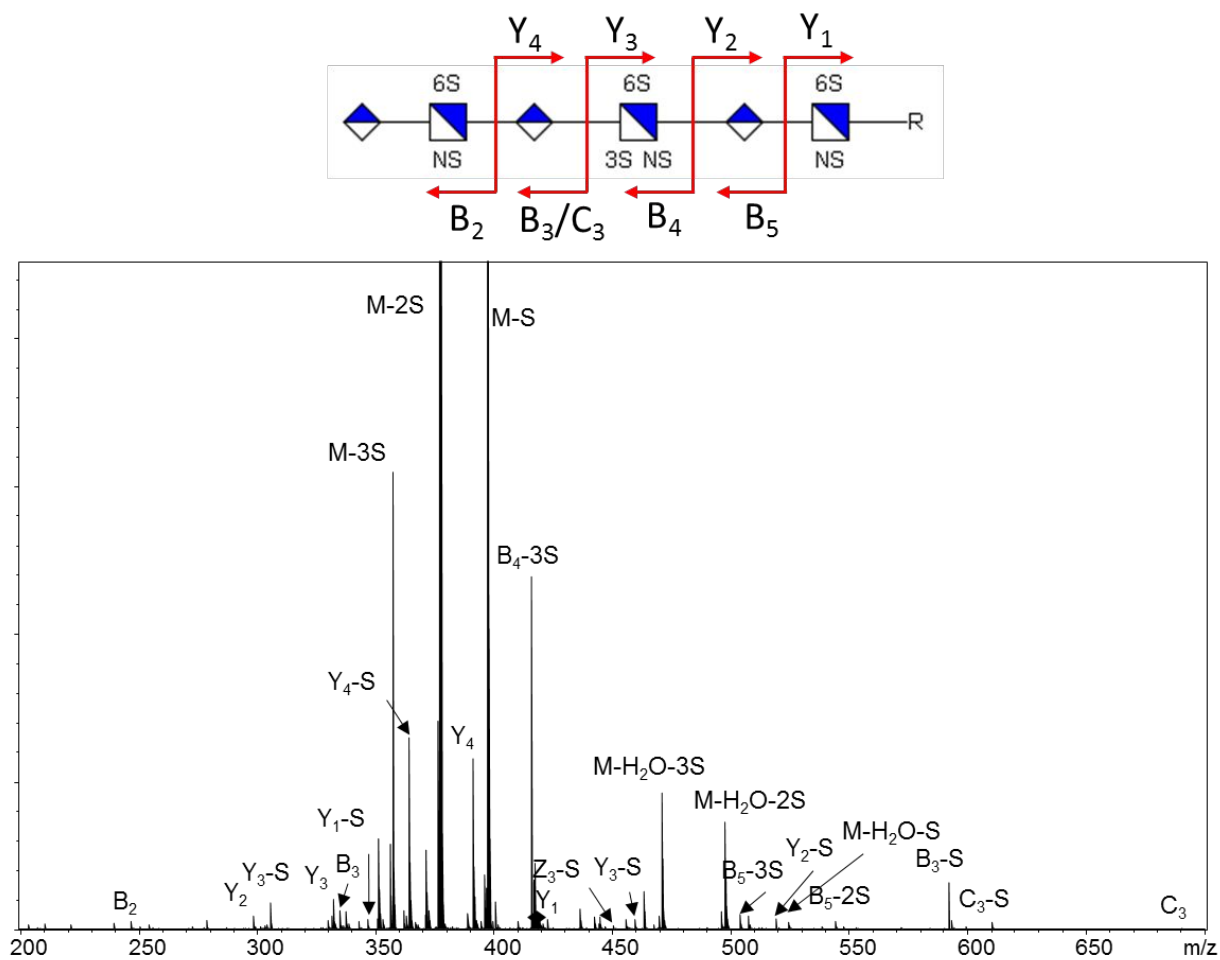

Figure S11. CID-MS/MS spectrum of **7a** using the  $[M-4H]^{4-}$  precursor.

Table S1. Observed precursor of highest charge state of each compound in LC-MS. Compounds of charge state enhanced were marked in bold.

|           | No. of Sulfate containing | Without ion suppressor |                              | With ion suppressor  |                              |
|-----------|---------------------------|------------------------|------------------------------|----------------------|------------------------------|
|           |                           | Highest charge state   | No. of free proton remaining | Highest charge state | No. of free proton remaining |
| 2a        | 2                         | 2-                     | 0                            | 2-                   | 0                            |
| 2b        | 2                         | 2-                     | 0                            | 2-                   | 0                            |
| 2c        | 2                         | 2-                     | 0                            | 2-                   | 0                            |
| 3a        | 3                         | 2-                     | 1                            | 2-                   | 1                            |
| <b>4a</b> | 4                         | <b>2-</b>              | 2                            | <b>3-</b>            | 1                            |
| <b>5a</b> | 5                         | <b>2-</b>              | 3                            | <b>3-</b>            | 2                            |
| <b>5b</b> | 5                         | <b>2-</b>              | 3                            | <b>3-</b>            | 2                            |
| <b>6a</b> | 6                         | <b>2-</b>              | 4                            | <b>4-</b>            | 2                            |
| <b>6b</b> | 6                         | <b>2-</b>              | 4                            | <b>4-</b>            | 2                            |
| <b>7a</b> | 7                         | <b>3-</b>              | 4                            | <b>4-</b>            | 3                            |
| <b>7b</b> | 7                         | <b>3-</b>              | 4                            | <b>4-</b>            | 3                            |
| <b>7c</b> | 7                         | <b>3-</b>              | 4                            | <b>4-</b>            | 3                            |

Table S2. List of assigned peaks in the NETD-MS/MS spectrum of **2b**,  $[M - 2H]^{2-}$ . Relative intensities were normalized to the total intensity in the spectrum, same below. RE, reducing end modification; A, NETD reagent.

| m/z      | Intensity | Charge | Error (ppm) | Assignment     |
|----------|-----------|--------|-------------|----------------|
| 365.1042 | 0.002%    | -1     | 4.91        | Z1''           |
| 375.0228 | 0.003%    | -1     | -2.79       | 0,2A2          |
| 385.1282 | 0.060%    | -1     | -1.02       | Y1             |
| 430.0658 | 0.012%    | -1     | -0.67       | 1,5A2          |
| 457.0529 | 0.003%    | -1     | -0.65       | B2'            |
| 458.0607 | 0.034%    | -1     | -0.60       | B2             |
| 474.0556 | 0.156%    | -1     | -0.70       | C2''           |
| 475.0635 | 0.072%    | -1     | -0.55       | C2'            |
| 476.0715 | 0.066%    | -1     | -0.13       | C2             |
| 543.1500 | 0.002%    | -1     | -0.33       | Z2             |
| 546.0763 | 0.020%    | -1     | -1.35       | 3,5A3          |
| 554.1365 | 0.007%    | -1     | 0.43        | B3-S           |
| 561.1611 | 0.004%    | -1     | 0.62        | Y2             |
| 562.0722 | 0.003%    | -1     | 0.46        | 0,3A3          |
| 570.1305 | 0.007%    | -1     | -1.23       | C3''-S         |
| 592.0825 | 0.006%    | -1     | -0.07       | 0,2A3          |
| 633.0844 | 0.079%    | -1     | -1.28       | B3'            |
| 634.0923 | 0.042%    | -1     | -1.30       | B3             |
| 650.0873 | 0.056%    | -1     | -1.14       | C3''           |
| 651.0949 | 0.032%    | -1     | -1.47       | C3'            |
| 652.1034 | 0.018%    | -1     | -0.39       | C3             |
| 784.1739 | 0.010%    | -1     | -2.41       | 2,4X2          |
| 809.1815 | 0.025%    | -1     | 4.83        | M''-RE-CO2-SO3 |
| 810.1857 | 0.006%    | -1     | 0.39        | M'-RE-CO2-SO3  |
| 826.1847 | 0.145%    | -1     | -1.99       | Z3             |
| 837.1707 | 0.003%    | -1     | -2.12       | M-RE-H2O-SO3   |
| 842.1794 | 0.155%    | -1     | -2.25       | Y3''           |
| 843.1856 | 0.105%    | -1     | -4.13       | Y3'            |
| 844.1949 | 0.059%    | -1     | -2.40       | Y3             |
| 853.1670 | 0.004%    | -1     | -0.45       | M''-RE-SO3     |
| 872.1896 | 0.081%    | -1     | -2.55       | 1,5X3          |
| 886.2052 | 0.010%    | -1     | -2.59       | 0,2X3          |
| 890.1414 | 0.007%    | -1     | -0.86       | M'-RE-CO2      |
| 894.2651 | 0.004%    | -1     | -1.76       | M''-CO2-SO3    |
| 916.2161 | 0.040%    | -1     | -2.05       | 0,3X3          |

|           |        |    |       |             |
|-----------|--------|----|-------|-------------|
| 922.2571  | 0.011% | -1 | -4.90 | M-H2O-SO3   |
| 930.2310  | 0.003% | -1 | -2.85 | M''-2CO2    |
| 934.1308  | 0.007% | -1 | -1.34 | M'-RE       |
| 938.2530  | 0.011% | -1 | -3.77 | M''-SO3     |
| 939.2610  | 0.007% | -1 | -3.52 | M'-SO3      |
| 956.2149  | 0.004% | -1 | 2.04  | M''-H2O-CO2 |
| 957.2190  | 0.006% | -1 | -1.86 | M'-H2O-CO2  |
| 958.2261  | 0.009% | -1 | -2.62 | M-H2O-CO2   |
| 960.2048  | 0.009% | -1 | -3.22 | 2,4X3       |
| 974.2198  | 0.019% | -1 | -3.81 | M''-CO2     |
| 975.2282  | 0.072% | -1 | -3.19 | M'-CO2      |
| 1001.2085 | 0.004% | -1 | -2.13 | M'-H2O      |
| 1002.2162 | 0.005% | -1 | -2.23 | M-H2O       |
| 1018.2096 | 0.049% | -1 | -3.63 | M''         |
| 1019.2176 | 0.295% | -1 | -3.52 | M'          |
| 1141.3380 | 0.009% | -1 | -4.07 | M'-SO3+A    |
| 1221.2942 | 0.172% | -1 | -4.30 | M'+A        |



Table S3. List of assigned peaks in the NETD-MS/MS spectrum of **2c**,  $[M - 2H]^{2-}$ .

| m/z      | Intensity | Charge | Error (ppm) | Assignment     |
|----------|-----------|--------|-------------|----------------|
| 385.1283 | 0.022%    | -1     | -0.80       | Y1             |
| 396.1147 | 0.003%    | -1     | -0.11       | C2             |
| 537.1065 | 0.007%    | -1     | -0.20       | 0,3X1          |
| 554.1363 | 0.004%    | -1     | 0.05        | B3-S           |
| 570.1303 | 0.009%    | -1     | -1.54       | C3''-S         |
| 623.1067 | 0.008%    | -1     | -0.47       | Z2             |
| 633.0833 | 0.003%    | -1     | -3.12       | B3'            |
| 634.0924 | 0.020%    | -1     | -1.08       | B3             |
| 639.1003 | 0.005%    | -1     | -2.46       | Y2''           |
| 641.1178 | 0.003%    | -1     | 0.36        | Y2             |
| 650.0870 | 0.022%    | -1     | -1.56       | C3''           |
| 651.0960 | 0.020%    | -1     | 0.32        | C3'            |
| 652.1029 | 0.021%    | -1     | -1.16       | C3             |
| 669.1119 | 0.427%    | -1     | -0.78       | 1,5X2          |
| 770.1615 | 0.004%    | -1     | 1.75        | 3,5X2          |
| 787.0770 | 0.006%    | -1     | -2.34       | 3,5A4-H        |
| 788.0856 | 0.009%    | -1     | -1.41       | 3,5A4          |
| 809.1748 | 0.004%    | -1     | -3.44       | M''-RE-CO2-SO3 |
| 826.1860 | 0.171%    | -1     | -0.36       | Z3             |
| 834.0897 | 0.006%    | -1     | -2.93       | 0,2A4          |
| 837.1713 | 0.003%    | -1     | -1.36       | M-RE-H2O-SO3   |
| 842.1807 | 0.073%    | -1     | -0.63       | Y3''           |
| 843.1875 | 0.063%    | -1     | -1.85       | Y3'            |
| 844.1966 | 0.047%    | -1     | -0.35       | Y3             |
| 853.1667 | 0.008%    | -1     | -0.78       | M''-RE-SO3     |
| 854.1729 | 0.004%    | -1     | -2.63       | M'-RE-SO3      |
| 872.1908 | 0.033%    | -1     | -1.12       | 1,5X3          |
| 885.1996 | 0.004%    | -1     | -0.01       | 0,2X3-H        |
| 886.2072 | 0.013%    | -1     | -0.34       | 0,2X3          |
| 888.1263 | 0.012%    | -1     | -0.31       | 1,5A4-H        |
| 916.1211 | 0.061%    | -1     | -0.34       | M'-RE-H2O      |
| 916.2179 | 0.023%    | -1     | -0.19       | 0,3X3          |
| 917.1257 | 0.017%    | -1     | -3.85       | M-RE-H2O       |
| 921.2514 | 0.003%    | -1     | -2.59       | M'-H2O-SO3     |
| 922.2607 | 0.013%    | -1     | -0.99       | M-H2O-SO3      |
| 931.2031 | 0.003%    | -1     | -2.19       | 3,5X3-H        |
| 933.1228 | 0.003%    | -1     | -1.45       | M''-RE         |
| 934.1322 | 0.004%    | -1     | 0.16        | M'-RE          |

|           |        |    |       |             |
|-----------|--------|----|-------|-------------|
| 938.2556  | 0.068% | -1 | -1.01 | M''-SO3     |
| 939.2605  | 0.022% | -1 | -4.08 | M'-SO3      |
| 956.2129  | 0.006% | -1 | -0.08 | M''-H2O-CO2 |
| 974.2236  | 0.021% | -1 | 0.12  | M''-CO2     |
| 975.2307  | 0.090% | -1 | -0.67 | M'-CO2      |
| 1018.2126 | 0.013% | -1 | -0.76 | M''         |
| 1019.2214 | 0.160% | -1 | 0.20  | M'          |
| 1020.2278 | 0.185% | -1 | -1.13 | M           |
| 1140.3383 | 0.004% | -1 | 3.10  | M''-SO3+A   |
| 1141.3410 | 0.005% | -1 | -1.37 | M'-SO3+A    |
| 1220.2889 | 0.004% | -1 | -2.18 | M''+A       |
| 1221.3010 | 0.166% | -1 | 1.26  | M'+A        |
| 1222.3038 | 0.097% | -1 | -2.79 | M+A         |

Table S4. List of assigned peaks in the NETD-MS/MS spectrum of **5b**, [M - 3H]<sup>3-</sup>.

| m/z      | Intensity | Charge | Error (ppm) | Assignment      |
|----------|-----------|--------|-------------|-----------------|
| 329.0176 | 0.014%    | -1     | -2.35       | 3,5A2           |
| 335.5157 | 0.077%    | -2     | -1.07       | B3-S            |
| 339.0279 | 0.143%    | -2     | -0.91       | Y2              |
| 343.1177 | 0.035%    | -1     | -0.91       | Y1-S            |
| 344.5212 | 0.015%    | -2     | -0.25       | C3-S            |
| 373.0081 | 0.016%    | -1     | -0.29       | 0,2A2-2H        |
| 375.0237 | 2.666%    | -1     | -0.51       | 0,2A2           |
| 375.4942 | 0.068%    | -2     | -0.53       | B3              |
| 383.4916 | 0.012%    | -2     | -0.69       | C3''            |
| 384.4994 | 0.076%    | -2     | -0.73       | C3              |
| 386.0398 | 0.011%    | -1     | -0.20       | 1,5A2-S-2H      |
| 403.0487 | 0.019%    | -1     | 0.05        | Z1''            |
| 404.0562 | 0.253%    | -1     | -0.66       | Z1'             |
| 405.0642 | 0.324%    | -1     | -0.17       | Z1              |
| 414.0344 | 0.029%    | -1     | -0.92       | B2''-S          |
| 415.0186 | 0.097%    | -2     | 3.29        | 1,4X2           |
| 415.0424 | 0.111%    | -1     | -0.50       | B2'-S           |
| 416.0502 | 0.208%    | -1     | -0.48       | B2-S            |
| 419.5631 | 0.012%    | -2     | 1.10        | Y3-2S           |
| 421.0592 | 0.045%    | -1     | -0.07       | Y1''            |
| 422.0666 | 0.018%    | -1     | -1.03       | Y1'             |
| 423.0746 | 0.248%    | -1     | -0.54       | Y1              |
| 432.0452 | 0.557%    | -1     | -0.44       | C2''-S          |
| 433.5607 | 0.009%    | -2     | 1.44        | 1,5X3-2S        |
| 434.0608 | 0.040%    | -1     | -0.41       | C2-S            |
| 435.5154 | 0.084%    | -2     | -0.46       | 0,2A4-S         |
| 449.5279 | 0.070%    | -2     | -0.20       | Z3''-S          |
| 450.0318 | 0.021%    | -2     | -0.10       | Z3'-S           |
| 450.5356 | 0.072%    | -2     | -0.35       | Z3-S            |
| 451.0693 | 0.030%    | -1     | -1.01       | 1,5X1           |
| 452.4914 | 0.010%    | -2     | 0.44        | 3,5A4           |
| 455.0209 | 0.049%    | -2     | -0.25       | M''-RE-H2O-2SO3 |
| 455.5243 | 0.020%    | -2     | -1.34       | M'-RE-H2O-2SO3  |
| 456.0286 | 0.064%    | -2     | -0.43       | M-RE-H2O-2SO3   |
| 458.5330 | 0.137%    | -2     | -0.43       | Y3''-S          |
| 459.5407 | 0.116%    | -2     | -0.74       | Y3-S            |
| 467.0042 | 0.013%    | -1     | -0.62       | 1,5A2-H         |
| 473.5383 | 0.326%    | -2     | -0.39       | 1,5X3-S         |
| 475.4931 | 0.020%    | -2     | -1.81       | 0,2A4           |

|          |        |    |       |                 |
|----------|--------|----|-------|-----------------|
| 480.0422 | 0.015% | -2 | -0.44 | 0,2X3-S-H       |
| 489.5070 | 0.016% | -2 | 1.38  | Z3''            |
| 490.0101 | 0.068% | -2 | -0.27 | Z3'             |
| 490.5139 | 0.114% | -2 | -0.56 | Z3              |
| 493.9913 | 0.027% | -1 | -0.70 | B2''            |
| 494.9992 | 0.310% | -2 | -0.45 | M''-RE-H2O-SO3  |
| 494.9992 | 0.310% | -1 | -0.45 | B2'             |
| 495.5032 | 0.186% | -2 | -0.34 | M'-RE-H2O-SO3   |
| 495.5526 | 0.011% | -2 | 1.88  | 0,3X3-S         |
| 496.0073 | 0.432% | -1 | 0.14  | B2              |
| 496.0073 | 0.432% | -2 | 0.14  | M-RE-H2O-SO3    |
| 497.5648 | 0.025% | -2 | -1.51 | M''-H2O-2SO3    |
| 498.5111 | 0.086% | -2 | -0.99 | Y3''            |
| 498.5731 | 0.357% | -2 | -0.61 | M-H2O-2SO3      |
| 499.0131 | 0.016% | -2 | -4.95 | Y3'             |
| 499.5193 | 0.196% | -2 | -0.38 | Y3              |
| 502.5407 | 0.056% | -2 | -1.02 | 1,4X3-S         |
| 504.0047 | 0.020% | -2 | -0.08 | M''-RE-SO3      |
| 504.0661 | 0.025% | -1 | -0.67 | 3,5A3-S         |
| 506.5706 | 0.133% | -2 | -0.50 | M''-2SO3        |
| 507.0727 | 0.034% | -2 | -4.19 | M'-2SO3         |
| 507.5785 | 0.126% | -2 | -0.37 | M-2SO3          |
| 512.0018 | 0.250% | -1 | -0.72 | C2''            |
| 513.5165 | 1.198% | -2 | -0.78 | 1,5X3           |
| 514.0178 | 0.507% | -1 | -0.01 | C2              |
| 515.5488 | 0.071% | -2 | -0.60 | M''-H2O-CO2-SO3 |
| 516.0511 | 0.023% | -2 | -3.58 | M'-H2O-CO2-SO3  |
| 520.0203 | 0.056% | -2 | -0.98 | 0,2X3-H         |
| 520.5235 | 0.023% | -2 | -2.50 | 0,2X3           |
| 524.5541 | 0.031% | -2 | -0.59 | M''-CO2-SO3     |
| 525.0577 | 0.019% | -2 | -1.14 | M'-CO2-SO3      |
| 535.4814 | 0.039% | -2 | -0.69 | M'-RE-H2O       |
| 535.5297 | 0.026% | -2 | -0.59 | 0,3X3           |
| 535.9857 | 0.012% | -2 | 0.14  | M-RE-H2O        |
| 537.5430 | 0.051% | -2 | -1.82 | M''-H2O-SO3     |
| 538.5514 | 0.520% | -2 | -0.82 | M-H2O-SO3       |
| 542.5191 | 0.101% | -2 | -1.07 | 1,4X3           |
| 543.0209 | 0.022% | -2 | -4.90 | 3,5X3-H         |
| 546.5487 | 0.547% | -2 | -1.15 | M''-SO3         |
| 547.0517 | 0.290% | -2 | -2.67 | M'-SO3          |
| 547.5566 | 0.943% | -2 | -0.95 | M-SO3           |

|          |        |    |       |                  |
|----------|--------|----|-------|------------------|
| 555.5270 | 0.039% | -2 | -0.87 | M''-H2O-CO2      |
| 556.0288 | 0.018% | -1 | 0.82  | 2,4A3            |
| 556.5638 | 0.028% | -2 | -0.44 | M'-RE-H2O-2SO3+A |
| 564.5330 | 0.025% | -2 | 0.40  | M''-CO2          |
| 565.0354 | 0.018% | -2 | -2.24 | M'-CO2           |
| 578.0255 | 0.083% | -2 | -1.40 | M'-H2O           |
| 578.5276 | 0.035% | -2 | -4.46 | M-H2O            |
| 580.0879 | 0.046% | -1 | -1.18 | Z2'-S            |
| 581.0958 | 0.036% | -1 | -1.07 | Z2-S             |
| 584.0222 | 0.034% | -1 | -1.85 | 3,5A3            |
| 586.5268 | 0.117% | -2 | -1.53 | M''              |
| 587.0307 | 0.391% | -2 | -1.51 | M'               |
| 587.5346 | 0.960% | -2 | -1.62 | M                |
| 589.0341 | 0.057% | -1 | 3.46  | 1,4X1            |
| 590.0661 | 0.050% | -1 | -1.26 | B3''-2S          |
| 591.0737 | 0.052% | -1 | -1.75 | B3'-2S           |
| 592.0821 | 0.053% | -1 | -0.63 | B3-2S            |
| 596.5408 | 0.017% | -2 | -2.81 | M'-RE-H2O-SO3+A  |
| 597.0905 | 0.049% | -1 | -1.42 | Y2''-S           |
| 599.1060 | 0.115% | -1 | -1.58 | Y2-S             |
| 608.0766 | 0.351% | -1 | -1.38 | C3''-2S          |
| 608.1131 | 0.444% | -2 | -1.39 | M'-2SO3+A        |
| 627.1007 | 0.052% | -1 | -1.96 | 1,5X2-S          |
| 647.5856 | 0.033% | -2 | -4.26 | M''-SO3+A        |
| 648.0910 | 0.855% | -2 | -2.04 | M'-SO3+A         |
| 660.0439 | 0.023% | -1 | -2.31 | Z2'              |
| 661.0517 | 0.055% | -1 | -2.27 | Z2               |
| 670.0222 | 0.068% | -1 | -2.26 | B3''-S           |
| 671.0297 | 0.219% | -1 | -2.67 | B3'-S            |
| 672.0376 | 0.139% | -1 | -2.56 | B3-S             |
| 677.0461 | 0.166% | -1 | -3.06 | Y2''             |
| 679.0621 | 0.343% | -1 | -2.51 | Y2               |
| 688.0321 | 0.099% | -1 | -3.16 | C3''-S           |
| 690.0487 | 0.026% | -1 | -1.76 | C3-S             |
| 707.0567 | 0.377% | -1 | -2.81 | 1,5X2            |
| 751.9938 | 0.020% | -1 | -3.18 | B3               |
| 770.0034 | 0.033% | -1 | -4.31 | C3               |
| 868.1247 | 0.010% | -1 | -3.20 | 1,5X3-2S         |
| 998.1512 | 0.008% | -1 | -2.90 | M-H2O-2SO3       |

Table S5. List of assigned peaks in the NETD-MS/MS spectrum of **7a**, [M - 4H]<sup>4-</sup>.

| m/z      | Intensity | Charge | Error (ppm) | Assignment    |
|----------|-----------|--------|-------------|---------------|
| 191.0198 | 0.010%    | -1     | 0.27        | C1''          |
| 329.0181 | 0.008%    | -1     | 0.94        | 3,5A2         |
| 375.0234 | 0.180%    | -1     | -1.23       | 0,2A2         |
| 391.3542 | 0.297%    | -3     | -0.94       | Y4            |
| 403.0481 | 0.047%    | -1     | -1.48       | Z1''          |
| 404.0559 | 0.050%    | -1     | -1.42       | Z1'           |
| 405.0637 | 0.767%    | -1     | -1.40       | Z1            |
| 415.0182 | 0.028%    | -2     | 2.35        | 1,4X2         |
| 415.042  | 0.045%    | -1     | -1.38       | B2'           |
| 416.0498 | 0.135%    | -2     | -1.47       | B4-3S         |
| 416.0498 | 0.135%    | -1     | -1.47       | B2-S          |
| 418.3912 | 0.023%    | -3     | -1.61       | Y5-3S         |
| 418.5542 | 0.017%    | -2     | -1.49       | Y3''-2S       |
| 419.562  | 0.056%    | -2     | -1.54       | Y3-2S         |
| 421.0587 | 0.213%    | -1     | -1.30       | Y1''          |
| 421.5158 | 0.414%    | -2     | 2.30        | 3,5X2-S-2H    |
| 421.6683 | 0.033%    | -3     | -1.43       | C5            |
| 423.0743 | 0.033%    | -1     | -1.46       | Y1            |
| 432.0448 | 0.305%    | -1     | -1.18       | C2''-S        |
| 434.0603 | 0.038%    | -1     | -1.69       | C2-S          |
| 451.0693 | 0.154%    | -1     | -1.14       | 1,5X1         |
| 459.5403 | 0.019%    | -2     | -1.74       | Y3-S          |
| 464.0256 | 0.011%    | -2     | -1.60       | C4''-2S       |
| 464.0769 | 0.012%    | -1     | -1.60       | 0,2X1-H       |
| 466.9958 | 0.004%    | -3     | 1.62        | 3,5A6         |
| 471.0237 | 0.014%    | -3     | -1.91       | Y5''-S        |
| 473.5377 | 0.021%    | -2     | -1.78       | 1,5X3-S       |
| 481.0273 | 0.089%    | -3     | -1.69       | 1,5X5-S       |
| 482.331  | 0.011%    | -3     | -1.61       | 0,2A6         |
| 490.5134 | 0.041%    | -2     | -1.59       | Z3            |
| 492.0082 | 0.162%    | -3     | -2.07       | Z5'           |
| 492.3444 | 0.096%    | -3     | -1.66       | Z5            |
| 494.9986 | 0.052%    | -2     | -1.65       | B4''-S        |
| 494.9986 | 0.052%    | -1     | -1.65       | B2'           |
| 495.5026 | 0.051%    | -2     | -1.44       | B4'-S         |
| 495.6706 | 0.013%    | -3     | -1.45       | M'-RE-H2O-SO3 |
| 496.0067 | 0.214%    | -3     | -1.16       | M-RE-H2O-SO3  |
| 496.0067 | 0.214%    | -1     | -1.16       | B2            |
| 496.0067 | 0.214%    | -2     | -1.16       | B4-S          |
| 497.6761 | 0.263%    | -3     | -1.57       | Y5''          |

|          |        |    |       |                |
|----------|--------|----|-------|----------------|
| 497.7172 | 0.035% | -3 | -1.59 | M-H2O-2SO3     |
| 498.3474 | 0.227% | -3 | -2.72 | Y5             |
| 499.0141 | 0.084% | -2 | -2.87 | Y3'            |
| 499.5187 | 0.106% | -2 | -1.62 | Y3             |
| 503.0489 | 0.065% | -3 | -1.62 | M''-2SO3       |
| 504.0039 | 0.025% | -2 | -1.64 | C4''-S         |
| 504.0657 | 0.046% | -1 | -1.63 | 3,5A3-S        |
| 504.0657 | 0.046% | -2 | -1.63 | B5-3S          |
| 505.0117 | 0.060% | -2 | -1.69 | C4-S           |
| 507.3219 | 0.016% | -3 | -4.90 | M''-RE-H2O-CO2 |
| 507.6795 | 0.999% | -3 | -1.70 | 1,5X5          |
| 512.0027 | 0.043% | -1 | 1.13  | C2''           |
| 512.0153 | 0.083% | -3 | -1.94 | 0,2X5-H        |
| 512.3502 | 0.034% | -3 | -3.95 | 0,2X5          |
| 513.0112 | 0.022% | -1 | 2.37  | C2'            |
| 513.0112 | 0.022% | -2 | -3.53 | 1,5X3-H        |
| 513.516  | 0.510% | -2 | -1.81 | 1,5X3          |
| 514.0176 | 0.194% | -1 | -0.49 | C2             |
| 520.0202 | 0.020% | -2 | -1.16 | 0,2X3-H        |
| 521.6815 | 0.111% | -3 | -4.55 | 0,3X5-2H       |
| 522.3228 | 0.036% | -3 | -1.53 | M'-RE-H2O      |
| 522.6586 | 0.021% | -3 | -1.73 | M-RE-H2O       |
| 523.6976 | 0.025% | -3 | -1.64 | M''-H2O-SO3    |
| 527.0146 | 0.012% | -3 | -1.77 | 3,5X5          |
| 529.7013 | 0.179% | -3 | -1.27 | M''-SO3        |
| 530.0368 | 0.118% | -3 | -2.12 | M'-SO3         |
| 530.3731 | 0.386% | -3 | -1.30 | M'-SO3         |
| 535.0248 | 0.021% | -2 | -2.56 | 0,3X3-H        |
| 535.6862 | 0.011% | -3 | -2.31 | M''-H2O-CO2    |
| 536.0222 | 0.016% | -3 | -2.17 | M'-H2O-CO2     |
| 537.0181 | 0.038% | -3 | -1.71 | 2,4X5          |
| 538.5508 | 0.045% | -2 | -1.91 | Z4-S           |
| 540.0143 | 0.043% | -2 | -1.74 | 3,5A5-S        |
| 541.6899 | 0.041% | -3 | -1.99 | M''-CO2        |
| 542.0261 | 0.040% | -3 | -1.37 | M'-CO2         |
| 543.9822 | 0.018% | -2 | -1.75 | C4''           |
| 544.99   | 0.117% | -2 | -1.77 | C4             |
| 546.5483 | 0.063% | -2 | -1.87 | Y4''-S         |
| 547.5561 | 0.058% | -2 | -1.83 | Y4-S           |
| 550.3498 | 0.036% | -3 | -1.68 | M''-H2O        |
| 550.6856 | 0.475% | -3 | -1.89 | M'-H2O         |
| 551.02   | 0.202% | -3 | -4.65 | M-H2O          |
| 556.3532 | 0.142% | -3 | -1.86 | M''            |

|          |        |    |       |             |
|----------|--------|----|-------|-------------|
| 556.6893 | 0.908% | -3 | -1.51 | M'          |
| 557.0251 | 1.473% | -3 | -1.74 | M           |
| 561.5533 | 0.027% | -2 | -2.20 | 1,5X4-S     |
| 570.407  | 0.061% | -3 | -3.64 | M''-2SO3+A  |
| 570.7442 | 0.208% | -3 | -1.46 | M'-2SO3+A   |
| 571.0781 | 0.128% | -3 | -4.99 | M-2SO3+A    |
| 577.5216 | 0.018% | -2 | -1.43 | Z4''        |
| 578.0252 | 0.031% | -2 | -1.86 | Z4'         |
| 578.5294 | 0.514% | -2 | -1.38 | Z4          |
| 579.9925 | 0.151% | -2 | -2.10 | 3,5A5       |
| 580.0877 | 0.013% | -1 | -1.59 | Z2'         |
| 581.0952 | 0.016% | -1 | -2.01 | Z2          |
| 583.0142 | 0.017% | -2 | -2.20 | B5''-S      |
| 583.0142 | 0.017% | -1 | -2.20 | 3,5A3-H     |
| 583.5185 | 0.165% | -2 | -1.56 | B5'-S       |
| 584.0224 | 0.229% | -1 | -1.53 | 3,5A3       |
| 584.0224 | 0.229% | -2 | -1.53 | B5-S        |
| 586.5267 | 0.259% | -2 | -1.61 | Y4''        |
| 587.5342 | 0.242% | -2 | -2.19 | Y4          |
| 589.6817 | 0.051% | -3 | -2.12 | M'-RE-H2O+A |
| 590.0162 | 0.024% | -3 | -4.62 | M-RE-H2O+A  |
| 591.0735 | 0.023% | -1 | -1.99 | B3'-S       |
| 592.0196 | 0.136% | -2 | -1.99 | C5''-S      |
| 592.0817 | 0.028% | -1 | -1.42 | B3-S        |
| 593.0272 | 0.224% | -2 | -2.32 | C5-S        |
| 597.0587 | 0.105% | -3 | -4.52 | M''-SO3+A   |
| 597.3961 | 1.794% | -3 | -1.92 | M'-SO3+A    |
| 597.7307 | 1.087% | -3 | -4.21 | M-SO3+A     |
| 599.1058 | 0.042% | -1 | -1.95 | Y2          |
| 601.5319 | 0.327% | -2 | -1.74 | 1,5X4       |
| 607.5436 | 0.044% | -2 | -2.08 | 0,2X4-S-H   |
| 608.076  | 0.029% | -1 | -2.31 | C3''-S      |
| 623.4967 | 0.503% | -2 | -1.77 | B5'         |
| 623.7112 | 0.016% | -3 | -3.89 | M''+A       |
| 623.9989 | 0.185% | -2 | -4.50 | B5          |
| 624.0484 | 0.442% | -3 | -1.94 | M'+A        |
| 624.3829 | 0.278% | -3 | -4.20 | M+A         |
| 631.9977 | 0.131% | -2 | -2.31 | C5''        |
| 633.0059 | 0.677% | -2 | -1.68 | C5          |
| 647.522  | 0.162% | -2 | -1.96 | 0,2X4-H     |
| 658.0555 | 0.019% | -2 | -1.94 | Z5''-2S     |
| 659.0637 | 0.014% | -2 | -1.40 | Z5-2S       |
| 670.0222 | 0.011% | -1 | -2.22 | B3''        |



|          |        |    |       |                |
|----------|--------|----|-------|----------------|
| 671.0301 | 0.089% | -2 | 0.29  | 3,5X4          |
| 671.0301 | 0.089% | -1 | -2.06 | B3'            |
| 672.0376 | 0.075% | -1 | -2.61 | B3             |
| 682.066  | 0.011% | -2 | -2.08 | 1,5X5-2S       |
| 688.0327 | 0.057% | -1 | -2.23 | C3"            |
| 697.0736 | 0.026% | -2 | 1.39  | 2,5X5-2S       |
| 698.0337 | 0.029% | -2 | -2.17 | Z5"-S          |
| 698.537  | 0.017% | -2 | -3.08 | Z5'-S          |
| 699.0416 | 0.042% | -2 | -2.04 | Z5-S           |
| 700.4928 | 0.014% | -2 | -2.57 | 3,5A6-H        |
| 703.5267 | 0.033% | -2 | -2.22 | M"-RE-H2O-2SO3 |
| 704.5348 | 0.828% | -2 | -1.89 | M-RE-H2O-2SO3  |
| 707.0394 | 0.014% | -2 | -1.59 | Y5"-S          |
| 712.5318 | 0.013% | -2 | -2.51 | M"-RE-2SO3     |
| 722.0438 | 0.024% | -2 | -2.68 | 1,5X5-S        |
| 739.0195 | 0.022% | -2 | -2.63 | Z5             |
| 743.5048 | 0.026% | -2 | -2.50 | M"-RE-H2O-SO3  |
| 744.5127 | 1.058% | -2 | -2.42 | M-RE-H2O-SO3   |
| 746.071  | 0.124% | -2 | -2.45 | M"-H2O-2SO3    |
| 747.077  | 0.022% | -2 | -4.98 | M-H2O-2SO3     |
| 752.51   | 0.011% | -2 | -2.55 | M"-RE-SO3      |
| 755.0764 | 0.231% | -2 | -2.24 | M"-2SO3        |
| 762.0219 | 0.016% | -2 | -2.95 | 1,5X5          |
| 773.0595 | 0.024% | -2 | -2.70 | M"-CO2-SO3     |
| 786.0491 | 0.093% | -2 | -2.72 | M"-H2O-SO3     |
| 795.0544 | 0.545% | -2 | -2.67 | M"-SO3         |
| 820.104  | 0.023% | -1 | -2.84 | Z3"-2S         |
| 835.0327 | 0.030% | -2 | -2.71 | M"             |
| 835.5349 | 0.023% | -2 | -4.77 | M'             |
| 856.1148 | 0.101% | -2 | -2.92 | M"-2SO3+A      |
| 896.0929 | 0.194% | -2 | -3.06 | M"-SO3+A       |
| 896.5952 | 0.149% | -2 | -4.93 | M'-SO3+A       |
| 911.0467 | 0.022% | -1 | -2.87 | B4"-2S         |
| 936.0712 | 0.032% | -2 | -3.11 | M"+A           |
| 936.5738 | 0.032% | -2 | -4.49 | M'+A           |

Table S6. List of assigned peaks in the NETD-MS/MS spectrum of **7c**, [M - 4H]<sup>4-</sup>.

| m/z      | Intensity | Charge | Error (ppm) | Assignment                          |
|----------|-----------|--------|-------------|-------------------------------------|
| 256.5051 | 0.053%    | -2     | -0.82       | C2                                  |
| 329.0179 | 0.033%    | -1     | -1.63       | 3,5A2                               |
| 334.5076 | 0.024%    | -2     | -1.91       | B3''                                |
| 375.0232 | 1.524%    | -1     | -1.96       | 0,2A2                               |
| 404.0556 | 0.115%    | -1     | -2.07       | Z1'                                 |
| 405.0631 | 0.113%    | -1     | -2.94       | Z1                                  |
| 412.5124 | 0.005%    | -2     | 1.02        | 3,5A4                               |
| 414.0339 | 0.035%    | -1     | -2.24       | B2''-S                              |
| 415.0179 | 0.045%    | -2     | 1.55        | 1,4X2                               |
| 415.0417 | 0.025%    | -1     | -2.18       | B2'-S                               |
| 416.0497 | 0.209%    | -2     | -1.86       | B4-2S                               |
| 416.0497 | 0.209%    | -1     | -1.86       | B2-S                                |
| 419.0569 | 0.129%    | -2     | -4.40       | Y3'-2S                              |
| 419.5618 | 0.064%    | -2     | -1.94       | Y3-2S                               |
| 421.0583 | 0.133%    | -1     | -2.31       | Y1''                                |
| 423.074  | 0.022%    | -1     | -2.14       | Y1                                  |
| 432.0444 | 0.731%    | -1     | -2.13       | C2''-S                              |
| 434.0597 | 0.049%    | -1     | -2.89       | C2-S                                |
| 435.5145 | 0.110%    | -2     | -2.38       | 0,2A4                               |
| 451.0686 | 0.019%    | -1     | -2.73       | 1,5X1                               |
| 455.5238 | 0.014%    | -2     | -2.37       | B4'-S                               |
| 459.5401 | 0.014%    | -2     | -2.19       | Y3-S                                |
| 464.0252 | 0.298%    | -2     | -2.43       | C4''-S                              |
| 465.0233 | 0.028%    | -3     | 4.74        | Z5''-S                              |
| 465.692  | 0.019%    | -3     | -2.03       | Z5-S                                |
| 466.9954 | 0.005%    | -3     | 2.47        | 3,5A6                               |
| 471.6952 | 0.014%    | -3     | -2.69       | Y5-S                                |
| 473.5372 | 0.032%    | -2     | -2.70       | 1,5X3-S                             |
| 481.0268 | 0.036%    | -3     | -2.62       | 1,5X5-S                             |
| 490.009  | 0.026%    | -2     | -2.60       | Z3'                                 |
| 490.513  | 0.057%    | -2     | -2.39       | Z3                                  |
| 492.0081 | 0.040%    | -3     | -2.47       | Z5'                                 |
| 492.3439 | 0.367%    | -3     | -2.65       | Z5                                  |
| 494.9982 | 0.376%    | -1     | -2.57       | B2'                                 |
| 494.9982 | 0.376%    | -2     | -2.57       | B4''                                |
| 495.502  | 0.239%    | -2     | -2.76       | B4'                                 |
| 497.6754 | 0.030%    | -3     | -2.85       | Y5''                                |
| 497.7168 | 0.020%    | -3     | -2.39       | M-H <sub>2</sub> O-2SO <sub>3</sub> |
| 498.3475 | 0.086%    | -3     | -2.51       | Y5                                  |
| 499.5181 | 0.091%    | -2     | -2.75       | Y3                                  |

|          |        |    |       |            |
|----------|--------|----|-------|------------|
| 503.0484 | 0.109% | -3 | -2.60 | M"-2SO3    |
| 504.0035 | 0.035% | -2 | -2.45 | C4"        |
| 504.0652 | 0.034% | -1 | -2.61 | 3,5A3-S    |
| 504.508  | 0.015% | -2 | -1.28 | C4'        |
| 505.0112 | 0.132% | -2 | -2.67 | C4         |
| 507.6792 | 0.754% | -3 | -2.32 | 1,5X5      |
| 512.0009 | 0.111% | -1 | -2.50 | C2"        |
| 512.3506 | 0.045% | -3 | -3.28 | 0,2X5      |
| 513.5155 | 0.180% | -2 | -2.79 | 1,5X3      |
| 514.0164 | 0.609% | -1 | -2.71 | C2         |
| 520.0211 | 0.043% | -2 | 0.45  | 0,2X3-H    |
| 520.5237 | 0.037% | -2 | -2.01 | 0,2X3      |
| 521.6819 | 0.033% | -3 | -3.87 | 0,3X5-2H   |
| 523.6971 | 0.025% | -3 | -2.49 | M"-H2O-SO3 |
| 524.0325 | 0.017% | -3 | -3.45 | M'-H2O-SO3 |
| 526.0182 | 0.020% | -2 | 0.82  | 2,4A5      |
| 529.7003 | 0.149% | -3 | -3.05 | M"-SO3     |
| 530.0358 | 0.102% | -3 | -3.98 | M'-SO3     |
| 530.3725 | 0.404% | -3 | -2.55 | M-SO3      |
| 535.024  | 0.070% | -2 | -3.94 | 0,3X3-H    |
| 535.5284 | 0.030% | -2 | -3.08 | 0,3X3      |
| 535.685  | 0.015% | -3 | -4.56 | M"-H2O-CO2 |
| 536.0216 | 0.043% | -3 | -3.21 | M'-H2O-CO2 |
| 538.5503 | 0.140% | -2 | -2.78 | Z4-S       |
| 540.0138 | 0.044% | -2 | -2.79 | 3,5A5      |
| 541.6893 | 0.038% | -3 | -3.04 | M"-CO2     |
| 542.0246 | 0.021% | -3 | -4.17 | M'-CO2     |
| 546.5477 | 0.082% | -2 | -2.93 | Y4"-S      |
| 547.5551 | 0.107% | -2 | -3.61 | Y4-S       |
| 550.6853 | 0.211% | -3 | -2.48 | M'-H2O     |
| 556.0269 | 0.053% | -1 | -2.67 | 2,4A3      |
| 556.3526 | 0.123% | -3 | -2.94 | M"         |
| 556.6887 | 0.672% | -3 | -2.63 | M'         |
| 557.0246 | 1.145% | -3 | -2.65 | M          |
| 561.5529 | 0.057% | -2 | -2.93 | 1,5X4-S    |
| 570.0238 | 0.212% | -2 | -3.61 | 1,5A5-S    |
| 570.7432 | 0.174% | -3 | -3.22 | M'-2SO3+A  |
| 577.5205 | 0.049% | -2 | -3.29 | Z4"        |
| 578.0248 | 0.212% | -2 | -2.57 | Z4'        |
| 578.5284 | 1.346% | -2 | -3.08 | Z4         |
| 583.0136 | 0.044% | -2 | -3.14 | B5"-S      |
| 584.0212 | 0.155% | -1 | -3.63 | 3,5A3      |
| 584.0212 | 0.155% | -2 | -3.63 | B5-S       |

|          |        |    |       |                 |
|----------|--------|----|-------|-----------------|
| 586.0382 | 0.014% | -1 | -1.20 | 1,4A3           |
| 586.5258 | 0.626% | -2 | -3.17 | Y4"             |
| 587.5337 | 0.778% | -2 | -3.03 | Y4              |
| 589.0346 | 0.054% | -1 | 4.22  | 3,5X1           |
| 590.0654 | 0.042% | -1 | -2.48 | B3"-S           |
| 592.0191 | 0.265% | -2 | -2.78 | C5"-S           |
| 592.0805 | 0.028% | -1 | -3.33 | B3-S            |
| 597.0587 | 0.081% | -3 | -4.52 | M"-SO3+A        |
| 597.3957 | 1.626% | -3 | -2.67 | M'-SO3+A        |
| 599.1054 | 0.018% | -1 | -2.53 | Y2-S            |
| 601.5313 | 0.235% | -2 | -2.83 | 1,5X4           |
| 607.5429 | 0.350% | -2 | -3.28 | 0,2X4-S-H       |
| 608.5418 | 0.085% | -2 | 1.69  | 0,2X4-S         |
| 623.9995 | 0.025% | -2 | -3.49 | B5              |
| 624.0475 | 0.462% | -3 | -3.31 | M'+A            |
| 630.0268 | 0.022% | -1 | -3.18 | 0,2A3           |
| 631.9969 | 0.017% | -2 | -3.54 | C5"             |
| 633.0046 | 0.045% | -2 | -3.71 | C5              |
| 658.0544 | 0.023% | -2 | -3.64 | Z5"-2S          |
| 659.0627 | 0.015% | -2 | -2.90 | Z5-2S           |
| 661.0508 | 0.065% | -1 | -3.68 | Z2              |
| 670.0213 | 0.071% | -1 | -3.52 | B3"             |
| 671.0295 | 0.056% | -2 | -0.58 | 3,5X4           |
| 671.0295 | 0.056% | -1 | -2.93 | B3'             |
| 672.0367 | 0.144% | -1 | -3.88 | B3              |
| 677.0455 | 0.024% | -1 | -3.93 | Y2"             |
| 679.0612 | 0.105% | -1 | -3.80 | Y2              |
| 681.0575 | 0.016% | -2 | -3.05 | 1,5X5-2S-2H     |
| 688.0319 | 0.033% | -1 | -3.35 | C3"             |
| 688.0684 | 0.013% | -2 | 1.46  | 0,2X5-2S-2H     |
| 697.075  | 0.083% | -2 | 3.42  | 2,5X5-2S        |
| 698.0323 | 0.030% | -2 | -4.20 | Z5"-S           |
| 699.0405 | 0.076% | -2 | -3.62 | Z5-S            |
| 704.5336 | 0.037% | -2 | -3.62 | M-RE-H2O-2SO3   |
| 707.0559 | 0.108% | -1 | -4.00 | 1,5X2           |
| 719.0796 | 0.013% | -1 | -4.01 | 0,2X2-S-H       |
| 722.0432 | 0.028% | -2 | -3.62 | 1,5X5-S         |
| 724.075  | 0.022% | -2 | -4.02 | M"-H2O-CO2-2SO3 |
| 728.0428 | 0.015% | -2 | -4.11 | 0,2X5-S-2H      |
| 729.0558 | 0.020% | -2 | 2.95  | 0,2X5-S         |
| 738.5148 | 0.013% | -2 | -3.74 | Z5'             |
| 739.0186 | 0.046% | -2 | -3.83 | Z5              |
| 744.5118 | 0.025% | -2 | -3.60 | M-RE-H2O-SO3    |

|          |        |    |       |                |
|----------|--------|----|-------|----------------|
| 746.0699 | 0.102% | -2 | -3.90 | M"-H2O-2SO3    |
| 755.0751 | 0.325% | -2 | -3.99 | M"-2SO3        |
| 762.0206 | 0.014% | -2 | -4.68 | 1,5X5          |
| 764.0533 | 0.038% | -2 | -3.96 | M"-H2O-CO2-SO3 |
| 773.0592 | 0.027% | -2 | -3.20 | M"-CO2-SO3     |
| 786.0481 | 0.111% | -2 | -4.00 | M"-H2O-SO3     |
| 795.0532 | 0.636% | -2 | -4.20 | M"-SO3         |
| 799.0363 | 0.047% | -1 | -3.78 | 0,2X2-H        |
| 835.032  | 0.014% | -2 | -3.52 | M"             |
| 847.6118 | 0.013% | -2 | -4.86 | M'-H2O-2SO3+A  |
| 856.1136 | 0.123% | -2 | -4.30 | M"-2SO3+A      |
| 883.0564 | 0.084% | -1 | 2.26  | 1,5A4-S-2H     |
| 884.0608 | 0.022% | -1 | -1.58 | 1,5A4-S-H      |
| 896.0916 | 0.281% | -2 | -4.50 | M"-SO3+A       |
| 911.0451 | 0.040% | -1 | -4.64 | B4"-S          |
| 929.0556 | 0.163% | -1 | -4.63 | C4"-S          |
| 936.0698 | 0.051% | -2 | -4.62 | M"+A           |

Table S7. List of assigned peaks in the CID-MS/MS spectrum of **5b**, [M - 3H]<sup>3-</sup>.

| m/z      | Intensity | Charge | Error (ppm) | Assignment    |
|----------|-----------|--------|-------------|---------------|
| 175.0248 | 0.036%    | -1     | -0.34       | B1            |
| 193.0352 | 0.007%    | -1     | -0.81       | C1            |
| 211.0335 | 0.426%    | -2     | -1.27       | Y1            |
| 247.4995 | 0.353%    | -2     | -1.97       | B2            |
| 256.5047 | 0.058%    | -2     | -2.24       | C2            |
| 259.0709 | 0.204%    | -2     | -2.19       | Y2-2S         |
| 277.5100 | 0.003%    | -2     | -1.97       | 2,4A3         |
| 299.0491 | 0.798%    | -2     | -2.39       | Y2-S          |
| 335.5150 | 0.340%    | -2     | -3.19       | B3-S          |
| 336.0926 | 0.018%    | -1     | -2.95       | B2-2S         |
| 339.0269 | 0.044%    | -2     | -4.00       | Y2            |
| 343.1169 | 0.459%    | -1     | -3.28       | Y1-S          |
| 344.5202 | 0.575%    | -2     | -3.34       | C3-S          |
| 354.1032 | 0.001%    | -1     | -2.91       | C2-2S         |
| 370.5776 | 0.114%    | -2     | -3.69       | Z3-3S         |
| 379.5828 | 1.016%    | -2     | -3.70       | Y3-3S         |
| 384.4983 | 0.018%    | -2     | -3.69       | C3            |
| 410.5558 | 0.715%    | -2     | -3.72       | Z3-2S         |
| 416.0488 | 1.288%    | -1     | -3.98       | B2-S          |
| 419.5610 | 0.112%    | -2     | -3.88       | Y3-2S         |
| 423.0733 | 0.035%    | -1     | -3.77       | Y1            |
| 434.0593 | 0.076%    | -1     | -3.80       | C2-S          |
| 439.1916 | 0.065%    | -1     | -4.05       | Y2-3S         |
| 456.0271 | 0.035%    | -2     | -3.92       | M-RE-H2O-2SO3 |
| 496.0051 | 0.040%    | -1     | -4.31       | B2            |
| 496.0051 | 0.040%    | -2     | -4.31       | M-RE-H2O-SO3  |
| 498.5711 | 3.476%    | -2     | -4.59       | M-H2O-2SO3    |
| 501.1374 | 0.010%    | -1     | -4.45       | Z2-2S         |
| 512.1235 | 0.042%    | -1     | -4.31       | C2-3S         |
| 519.1477 | 0.256%    | -1     | -4.79       | Y2-2S         |

Table S8. List of assigned peaks in the CID-MS/MS spectrum of **7a**, [M - 4H]<sup>4+</sup>.

| m/z      | Intensity | Charge | Error (ppm) | Assignment    |
|----------|-----------|--------|-------------|---------------|
| 416.0512 | 1.810%    | -1     | 1.77        | B2-S          |
| 416.0512 | 1.810%    | -2     | 1.77        | B4-3S         |
| 364.7029 | 0.976%    | -3     | 1.63        | Y4-S          |
| 391.3553 | 0.886%    | -3     | 1.74        | Y4            |
| 471.0666 | 0.659%    | -3     | 1.86        | M-H2O-3SO3    |
| 497.7190 | 0.510%    | -3     | 1.90        | M-H2O-2SO3    |
| 592.0839 | 0.233%    | -1     | 2.35        | B3-S          |
| 332.6778 | 0.136%    | -3     | 1.67        | Y3            |
| 306.0255 | 0.133%    | -3     | 1.91        | Y3-S          |
| 389.0138 | 0.082%    | -3     | 1.79        | B5-S          |
| 335.5166 | 0.078%    | -2     | 1.67        | B3            |
| 362.3614 | 0.068%    | -3     | 1.67        | B5-2S         |
| 299.0503 | 0.067%    | -2     | 1.37        | Y2            |
| 496.0082 | 0.065%    | -1     | 1.98        | B2            |
| 496.0082 | 0.065%    | -2     | 1.98        | B4-S          |
| 496.0082 | 0.065%    | -3     | 1.98        | M-RE-H2O-SO3  |
| 419.5635 | 0.057%    | -2     | 2.06        | Y3-2S         |
| 338.0506 | 0.053%    | -3     | 1.68        | Y4-2S         |
| 418.3927 | 0.052%    | -3     | 1.95        | Y5-3S         |
| 519.1512 | 0.051%    | -1     | 2.01        | Y2-S          |
| 456.0298 | 0.047%    | -2     | 2.18        | B4-2S         |
| 442.7036 | 0.047%    | -3     | 1.95        | M-RE-H2O-3SO3 |
| 507.5798 | 0.045%    | -2     | 2.12        | Y4-2S         |
| 544.0461 | 0.039%    | -2     | 2.15        | B5-2S         |
| 395.0174 | 0.039%    | -3     | 1.97        | C5-S          |
| 410.5581 | 0.039%    | -2     | 1.75        | Z3-2S         |
| 610.0947 | 0.034%    | -1     | 2.58        | C3-S          |
| 524.3714 | 0.033%    | -3     | 2.14        | M-H2O-SO3     |
| 459.5418 | 0.031%    | -2     | 1.61        | Y3-S          |
| 445.0450 | 0.025%    | -3     | 1.75        | Y5-2S         |
| 247.5002 | 0.024%    | -2     | 0.94        | B2            |
| 330.3363 | 0.023%    | -3     | 1.58        | B4-S          |
| 504.0675 | 0.019%    | -1     | 2.06        | 3,5A4-S       |
| 504.0675 | 0.019%    | -2     | 2.06        | B5-3S         |
| 450.5367 | 0.019%    | -2     | 1.96        | Z3-S          |
| 303.6839 | 0.017%    | -3     | 1.36        | B4-2S         |
| 538.5531 | 0.012%    | -2     | 2.29        | Z4-S          |
| 279.3730 | 0.011%    | -3     | 1.18        | Y3-2S         |

|          |        |    |      |       |
|----------|--------|----|------|-------|
| 412.3892 | 0.009% | -3 | 1.96 | Z5-3S |
| 423.0757 | 0.009% | -1 | 2.04 | Y1    |
| 368.3650 | 0.008% | -3 | 1.66 | C5-2S |
| 415.6661 | 0.006% | -3 | 1.71 | B5    |
| 379.5849 | 0.004% | -2 | 1.81 | Y3-3S |
| 467.6012 | 0.004% | -2 | 1.94 | Y4-3S |
| 690.0516 | 0.002% | -1 | 2.46 | C3    |
| 343.1186 | 0.001% | -1 | 1.64 | Y1-S  |
| 356.9886 | 0.000% | -3 | 1.66 | B4    |
